# Supplementary material for: A mechanistic study on the oxidation of hydrazides: application to the tuberculosis drug isoniazid
Source: Royal Society of Chemistry journal article supplement (doi:10.1039/b719570b), 2008-01-01

SpinWorks 2.5: STANDARD 1H OBSERVE

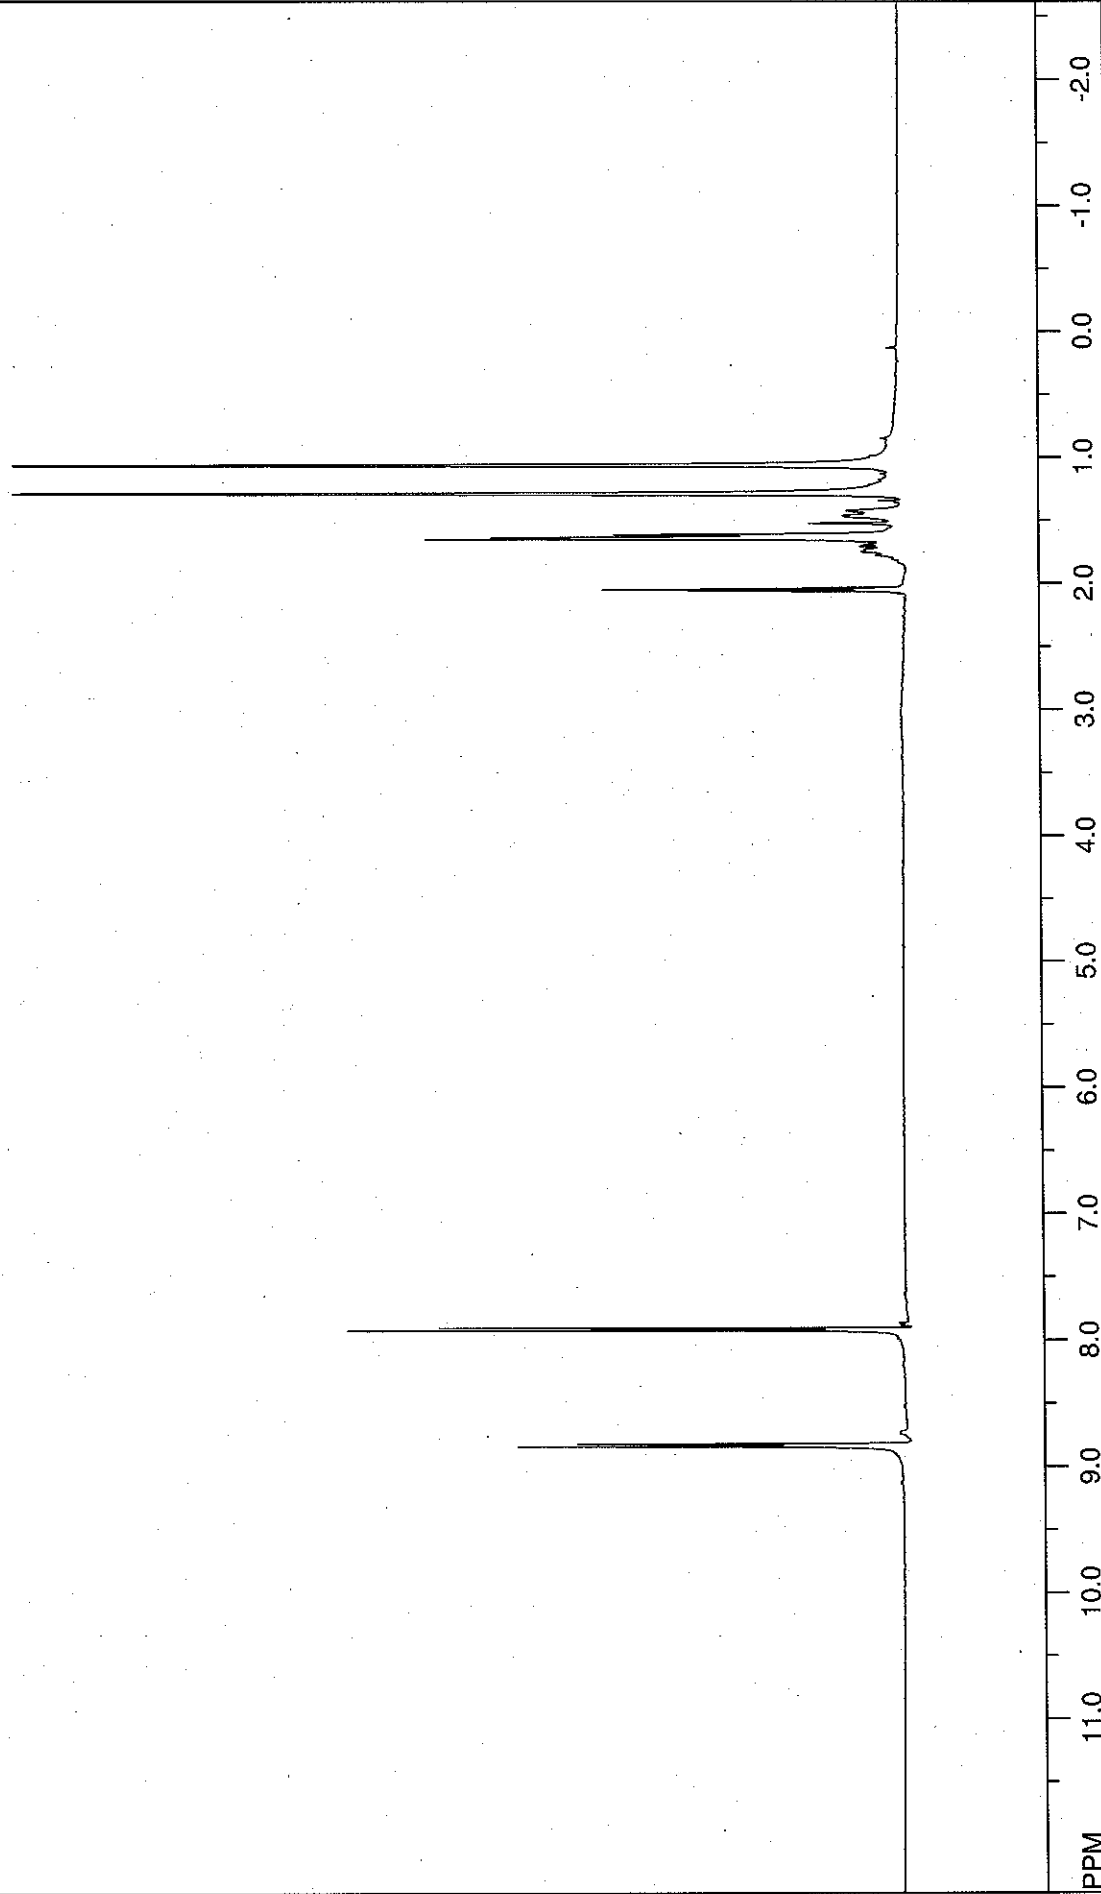

file: C:\Documents and Settings\Ruth\My Documents\NMR\rah2\_34\_acetone.ftid\id block# 1 expt: "s2pul"freq. of 0 ppm: 299.889779 MHz  
transmitter freq.: 299.891243 MHz  
time domain size: 36004 points  
width: 4498.43 Hz = 15.000190 ppm = 0.124942 Hz/pt  
processed size: 65536 complex points  
LB: 0.500 GB: 0.0000  
Hz/cm: 179.936 ppm/cm: 0.60000  
number of scans: 4

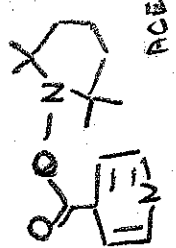

SpinWorks 2.5: 13C OBSERVE

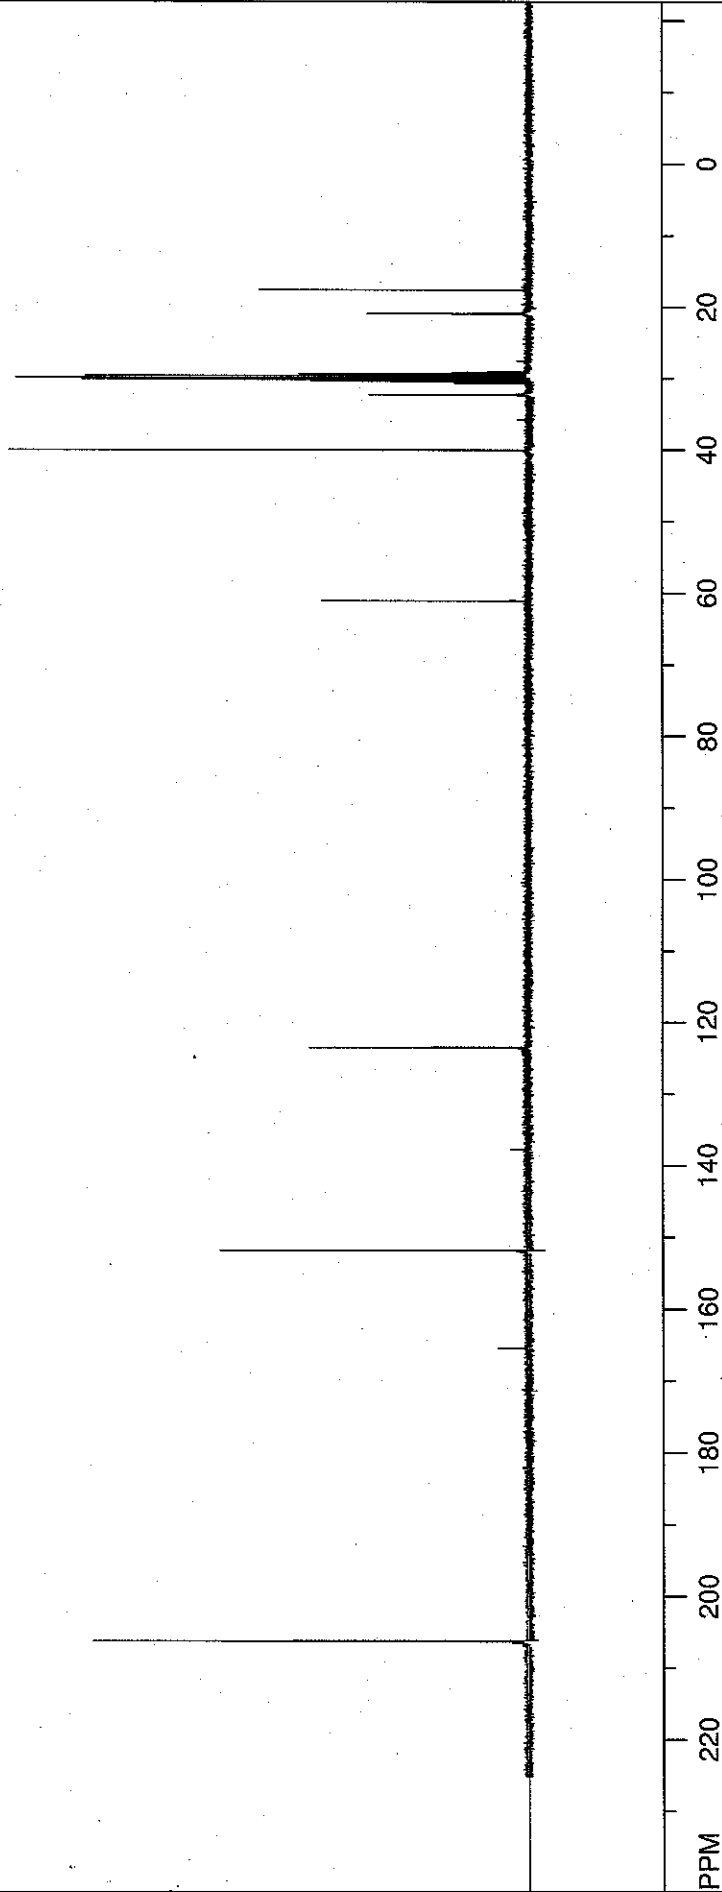

file: C:\Documents and Settings\Ruth\My Documents\NMR\ah2\_34\_13c.fid\fid\_block# 1 expt: "s2pul"  
transmitter freq.: 75.414876 MHz  
time domain size: 68106 points  
width: 18761.73 Hz = 248.780175 ppm = 0.275478 Hz/pt  
number of scans: 977

processed size: 65536 complex points  
LB: 1.000 GB: 0.0000  
Hz/cm: 796.043 ppm/cm: 10.55552

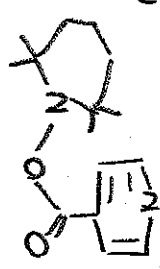

ACETONE-D6

SpinWorks 2.5: STANDARD 1H OBSERVE

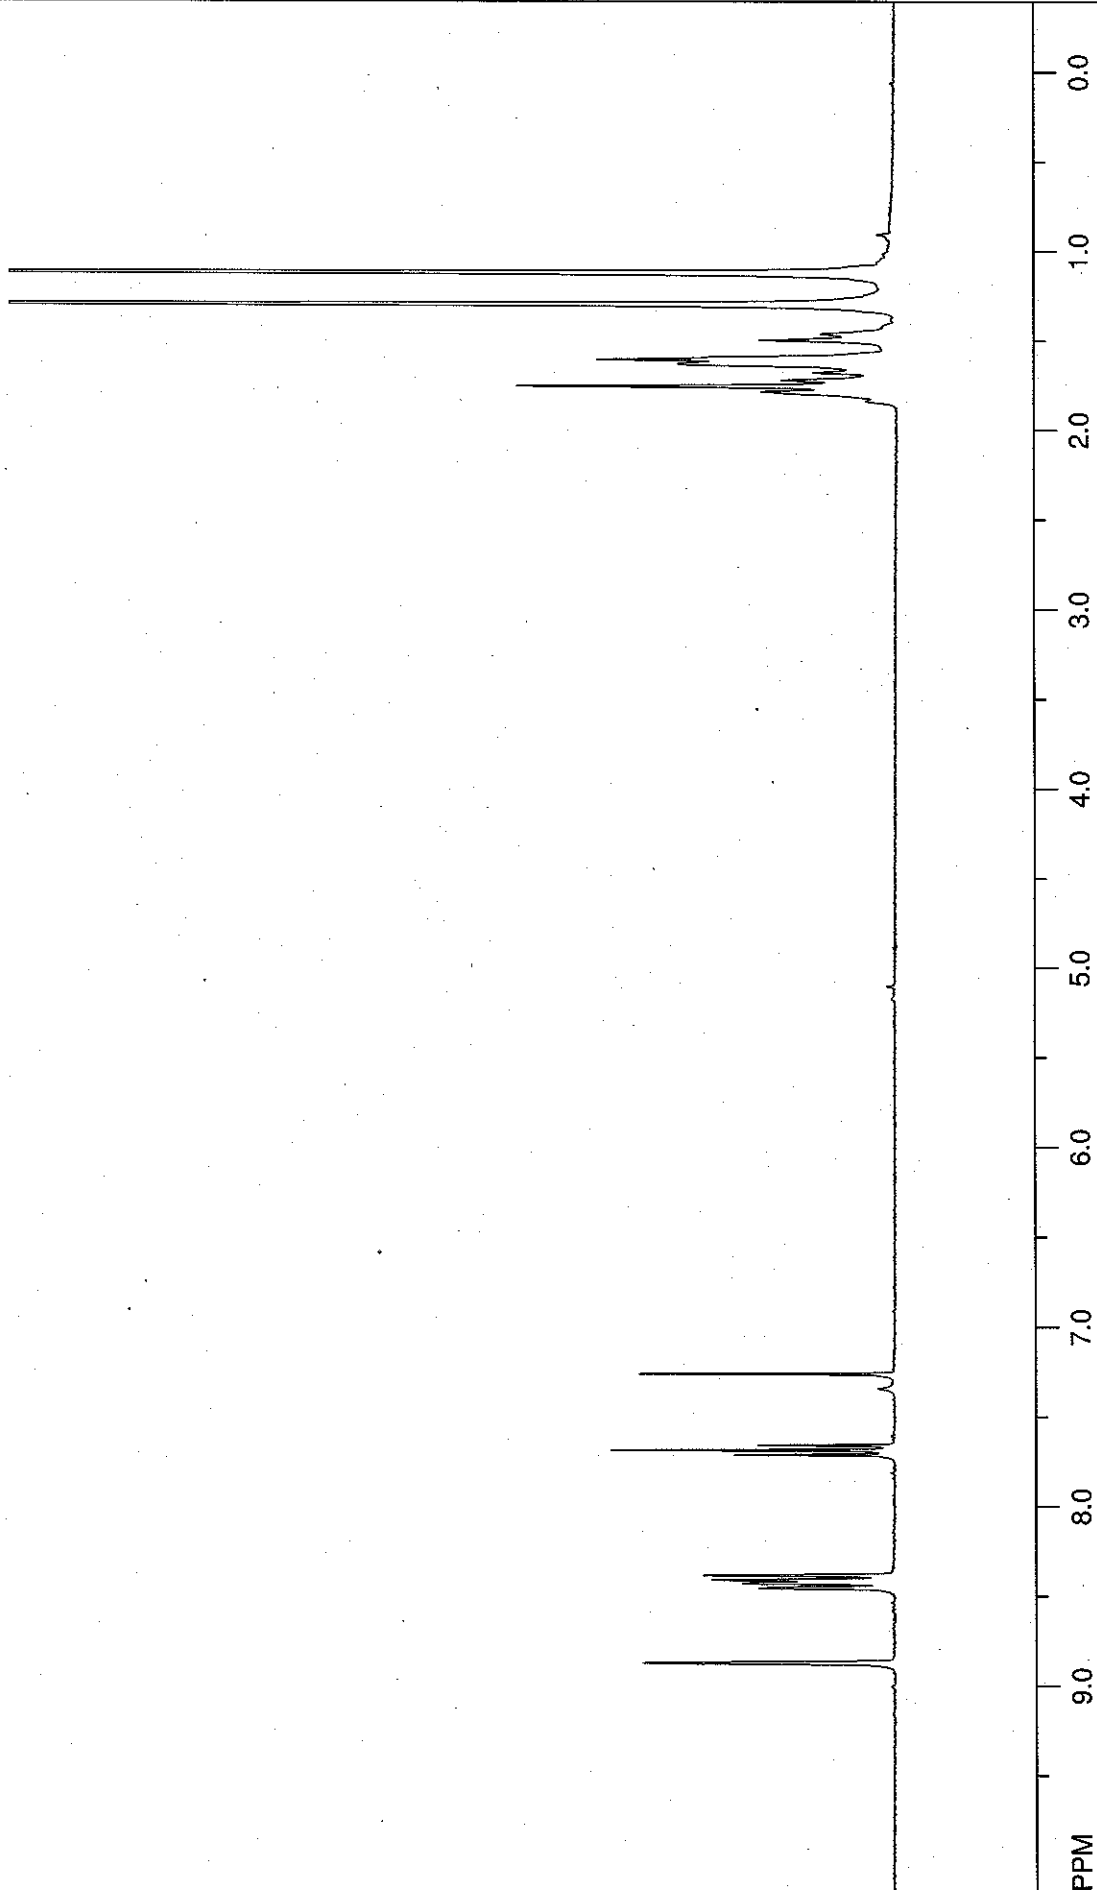

file: C:\Documents and Settings\Ruth\My Documents\NMR\phd82f3.fid\fid block# 1 expt: "s2pul"

transmitter freq.: 299.889686 MHz

time domain size: 36004 points

width: 4498.43 Hz = 15.000268 ppm = 0.124942 Hz/pt

number of scans: 4

freq. of 0 ppm: 299.888223 MHz

processed size: 65536 complex points

LB: 0.500 GB: 0.0000

Hz/cm: 126.518 ppm/cm: 0.42188

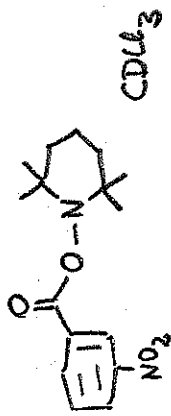

SpinWorks 2.5: 13C OBSERVE

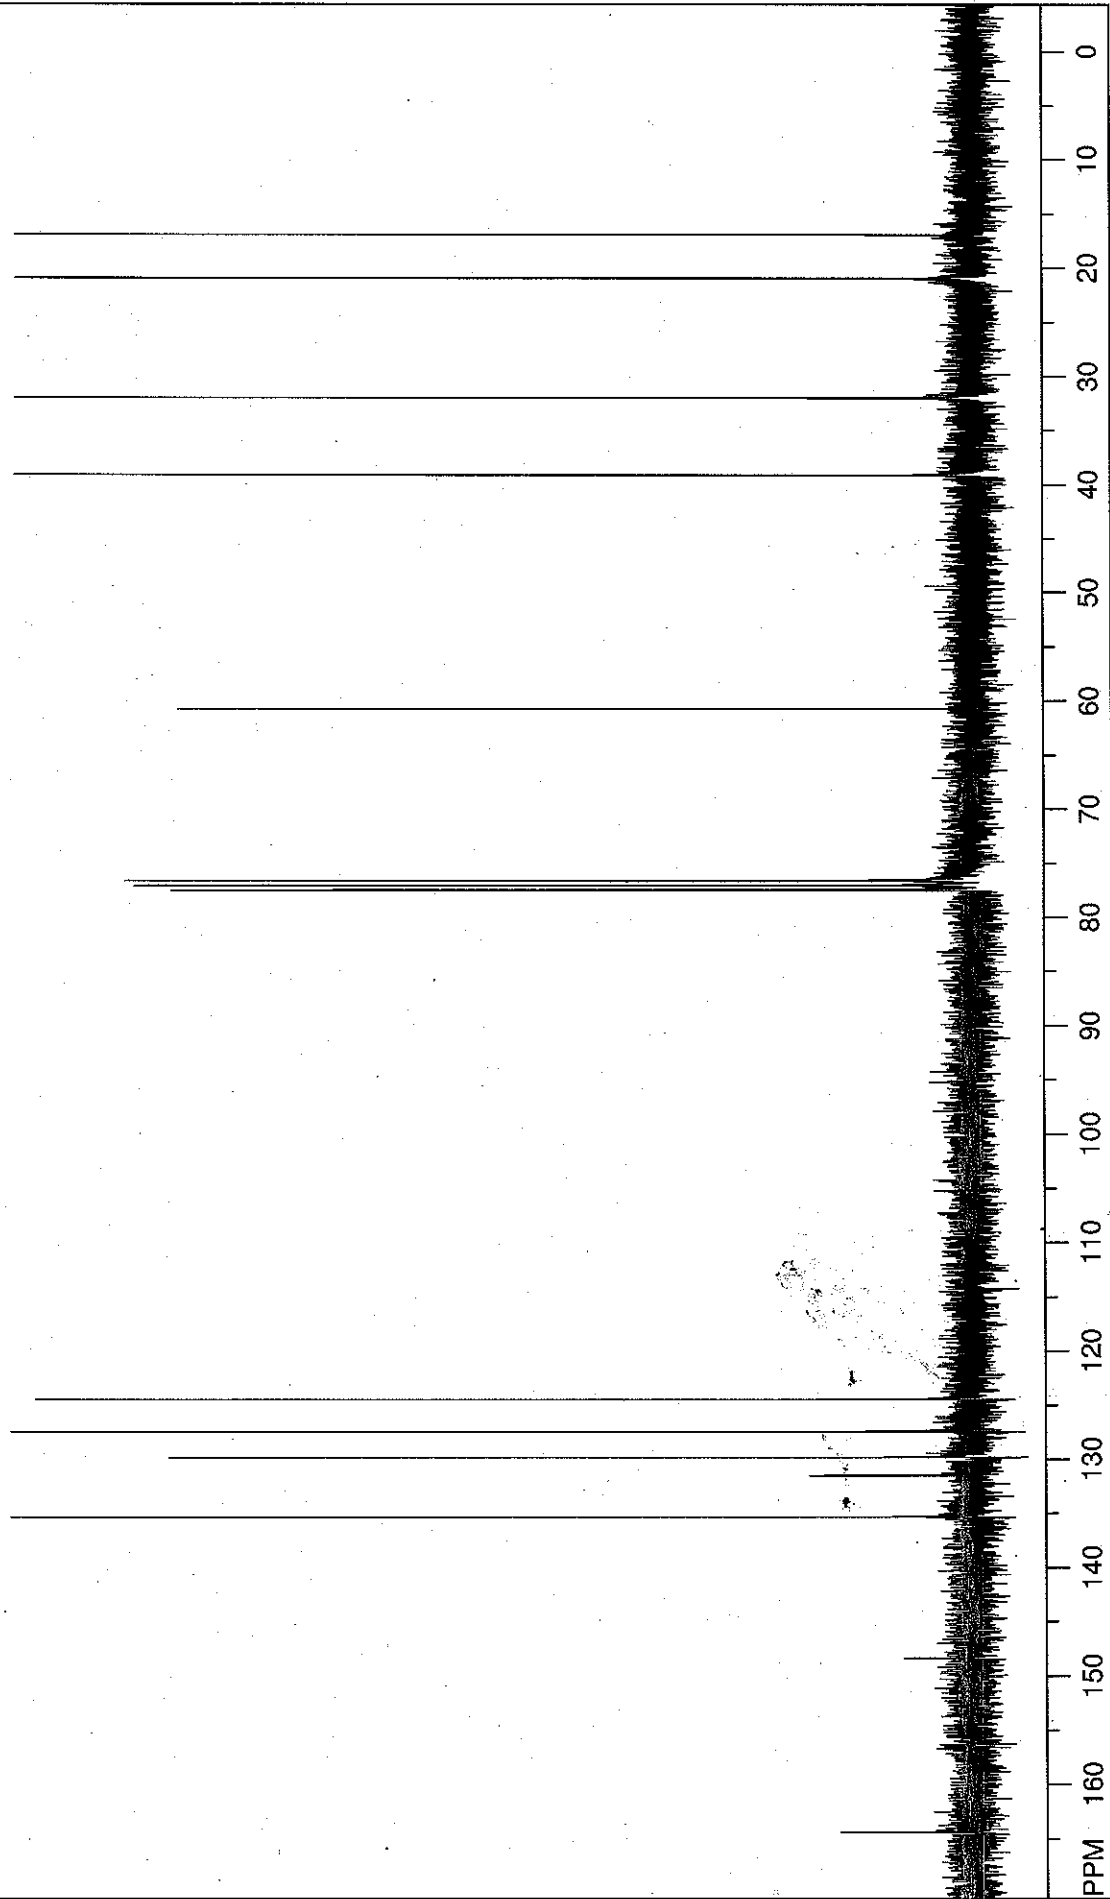

file: C:\Documents and Settings\RuthMy Documents\NMR\phd82fr3\_13C.fid.tif block# 1 expt: "s2pul" freq. of 0 ppm: 75.406951 MHz  
transmitter freq.: 75.414485 MHz processed size: 65536 complex points  
time domain size: 68106 points LB: 1.000 GB: 0.0000  
width: 18761.73 Hz = 248.781466 ppm = 0.275478 Hz/pt Hz/cm: 527.621 ppm/cm: 6.99628  
number of scans: 2000

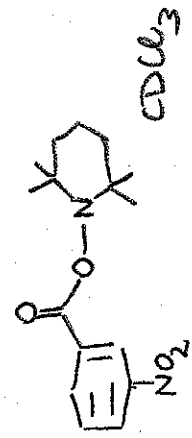

Supplement: b719570b-(b).pdf [file b719570b-%28b%29.pdf]
